# Supplementary material for: Validity and reliability of My Jump 2® app to measure the vertical jump on elite women beach volleyball players
Source: PeerJ. 2024 May 17;12:e17387. doi: 10.7717/peerj.17387 (PMC11104343; doi:10.7717/peerj.17387)
Supplement: Supplemental Information 1 [file peerj-12-17387-s001.xls]

## Sheet: Atualizada_ORDENADA_base_de_dad
Participant	Players	Age	Player position	Weight	Height	Power (W)_Platform	High Jump_Platform	Flight Time (ms)_Plataform	Flight Time (ms)_My Jump_Observador 1	Flight Time (ms)_My Jump_Observador 2	Jump hight (cm)_My Jump_Observador 1	Jump hight (cm)_My Jump_Observador 2	Power (W)_My Jump_Observador 1	Power (W)_My Jump_Observador 2	Flight Time (ms)_My Jump_Observador _Mean	Jump hight (cm)_My Jump_Observador _Mean	Power (W)_My Jump_Observador _Mean	Categorias_test_t	Flight Time (ms)_My Jump_Observador _test_t	Jump hight (cm)_My Jump_Observador _test_t	Power (W)_My Jump_Observador _test_t	Observador vs plataforma	Flight Time (ms)_My Jump (2)	Jump hight (cm)_My Jump (2)	Power (W)_My Jump (2)
1	A	19	Blocker	69.17	1.73	1244.53	26.31	462.00	480.00	480.00	28.25	28.25	1443.61	1443.61	480.00	28.25	1443.61	Observador 1	480	28.25	1443.61	Observador	480.00	28.25	1443.61
1	A	19	Blocker			1214.56	26.40	473.00	440.00	480.00	23.74	28.25	1228.90	1443.61	460.00	26.00	1336.26	Observador 1	440	23.74	1228.9	Observador	460.00	26.00	1336.26
1	A	19	Blocker			1248.68	27.43	467.00	480.00	440.00	28.25	23.74	1443.61	1228.90	460.00	26.00	1336.26	Observador 1	480	28.25	1443.61	Observador	460.00	26.00	1336.26
1	A	19	Blocker			1169.16	25.12	466.00	480.00	440.00	28.25	23.74	1443.61	1228.90	460.00	26.00	1336.26	Observador 1	480	28.25	1443.61	Observador	460.00	26.00	1336.26
1	A	19	Blocker			1157.86	26.17	465.00	480.00	440.00	28.25	23.74	1443.61	1228.90	460.00	26.00	1336.26	Observador 1	480	28.25	1443.61	Observador	460.00	26.00	1336.26
1	A	19	Blocker			1186.93	25.85	455.00	440.00	440.00	23.74	23.74	1228.90	1228.90	440.00	23.74	1228.90	Observador 1	440	23.74	1228.9	Observador	440.00	23.74	1228.90
2	B	20	Defender	66	1.73	1765.42	35.47	516.00	560.00	560.00	38.46	38.46	2257.03	2257.03	560.00	38.46	2257.03	Observador 1	560	38.46	2257.03	Observador	560.00	38.46	2257.03
2	B	20	Defender			1944.61	35.63	535.00	520.00	520.00	33.16	33.16	1920.85	1920.85	520.00	33.16	1920.85	Observador 1	520	33.16	1920.85	Observador	520.00	33.16	1920.85
2	B	20	Defender			1788.85	35.66	518.00	560.00	560.00	38.46	38.46	2257.03	2257.03	560.00	38.46	2257.03	Observador 1	560	38.46	2257.03	Observador	560.00	38.46	2257.03
2	B	20	Defender			1822.84	37.96	536.00	520.00	520.00	33.16	33.16	1920.85	1920.85	520.00	33.16	1920.85	Observador 1	520	33.16	1920.85	Observador	520.00	33.16	1920.85
2	B	20	Defender			1686.91	36.20	528.00	560.00	560.00	38.46	38.46	2257.03	2257.03	560.00	38.46	2257.03	Observador 1	560	38.46	2257.03	Observador	560.00	38.46	2257.03
2	B	20	Defender			1792.49	37.10	542.00	520.00	520.00	33.16	33.16	1920.85	1920.85	520.00	33.16	1920.85	Observador 1	520	33.16	1920.85	Observador	520.00	33.16	1920.85
3	C	17	Defender	62.55	1.72	1403.91	27.36	461.00	480.00	480.00	28.25	28.25	1130.52	1130.52	480.00	28.25	1130.52	Observador 1	480	28.25	1130.52	Observador	480.00	28.25	1130.52
3	C	17	Defender			1516.62	28.24	481.00	480.00	480.00	28.25	28.25	1130.52	1130.52	480.00	28.25	1130.52	Observador 1	480	28.25	1130.52	Observador	480.00	28.25	1130.52
3	C	17	Defender			1387.28	26.31	481.00	480.00	480.00	28.25	28.25	1130.52	1130.52	480.00	28.25	1130.52	Observador 1	480	28.25	1130.52	Observador	480.00	28.25	1130.52
3	C	17	Defender			1520.69	29.11	467.00	480.00	480.00	28.25	28.25	1130.52	1130.52	480.00	28.25	1130.52	Observador 1	480	28.25	1130.52	Observador	480.00	28.25	1130.52
3	C	17	Defender			1485.19	26.06	452.00	480.00	480.00	28.25	28.25	1130.52	1130.52	480.00	28.25	1130.52	Observador 1	480	28.25	1130.52	Observador	480.00	28.25	1130.52
3	C	17	Defender			1416.87	27.39	454.00	480.00	480.00	28.25	28.25	1130.52	1130.52	480.00	28.25	1130.52	Observador 1	480	28.25	1130.52	Observador	480.00	28.25	1130.52
4	D	24	Defender	76.65	1.8	2105.53	34.14	509.00	511.25	515.42	32.05	32.58	1572.36	1595.56	513.34	32.32	1583.96	Observador 1	511.25	32.05	1572.36	Observador	513.34	32.32	1583.96
4	D	24	Defender			2128.45	31.91	515.00	507.08	511.25	31.53	32.05	1549.40	1572.36	509.17	31.79	1560.88	Observador 1	507.08	31.53	1549.4	Observador	509.17	31.79	1560.88
4	D	24	Defender			2081.97	35.39	516.00	527.92	519.58	34.18	33.10	1666.69	1619.01	523.75	33.64	1642.85	Observador 1	527.92	34.18	1666.69	Observador	523.75	33.64	1642.85
4	D	24	Defender			2012.69	33.53	514.00	511.25	528.33	32.05	34.23	1572.36	1669.10	519.79	33.14	1620.73	Observador 1	511.25	32.05	1572.36	Observador	519.79	33.14	1620.73
4	D	24	Defender			2067.31	33.53	529.00	524.17	515.42	33.69	32.58	1645.11	1595.56	519.80	33.14	1620.34	Observador 1	524.17	33.69	1645.11	Observador	519.80	33.14	1620.34
4	D	24	Defender			2111.22	30.34	512.00	507.08	507.08	31.53	31.53	1549.40	1549.40	507.08	31.53	1549.40	Observador 1	507.08	31.53	1549.4	Observador	507.08	31.53	1549.40
5	E	26	Blocker	71.24	1.82	1896.52	36.20	528.00	544.58	548.75	36.37	36.93	2103.91	2138.12	546.67	36.65	2121.02	Observador 1	544.58	36.37	2103.91	Observador	546.67	36.65	2121.02
5	E	26	Blocker			1997.64	38.21	540.00	540.42	536.67	35.81	35.32	2070.11	2040.03	538.55	35.57	2055.07	Observador 1	540.42	35.81	2070.11	Observador	538.55	35.57	2055.07
5	E	26	Blocker			1938.06	37.29	541.00	536.25	548.75	35.26	36.93	2036.71	2138.12	542.50	36.10	2087.42	Observador 1	536.25	35.26	2036.71	Observador	542.50	36.10	2087.42
5	E	26	Blocker			1953.11	35.77	540.00	548.75	536.25	36.93	35.26	2138.12	2036.71	542.50	36.10	2087.42	Observador 1	548.75	36.93	2138.12	Observador	542.50	36.10	2087.42
5	E	26	Blocker			1888.92	36.77	559.00	561.25	557.08	38.63	38.06	2243.27	2207.80	559.17	38.35	2225.54	Observador 1	561.25	38.63	2243.27	Observador	559.17	38.35	2225.54
5	E	26	Blocker			2080.96	40.85	550.00	548.75	540.42	36.93	35.81	2138.12	2070.11	544.59	36.37	2104.12	Observador 1	548.75	36.93	2138.12	Observador	544.59	36.37	2104.12
6	F	19	Defender	59.92	1.74	1342.36	34.48	510.00	560.00	560.00	38.46	38.46	1324.72	1324.72	560.00	38.46	1324.72	Observador 1	560	38.46	1324.72	Observador	560.00	38.46	1324.72
6	F	19	Defender			1334.92	32.91	501.00	520.00	520.00	33.16	33.16	1163.91	1163.91	520.00	33.16	1163.91	Observador 1	520	33.16	1163.91	Observador	520.00	33.16	1163.91
6	F	19	Defender			1319.21	34.14	500.00	520.00	520.00	33.16	33.16	1163.91	1163.91	520.00	33.16	1163.91	Observador 1	520	33.16	1163.91	Observador	520.00	33.16	1163.91
6	F	19	Defender			1368.88	33.74	509.00	520.00	520.00	33.16	33.16	1163.91	1163.91	520.00	33.16	1163.91	Observador 1	520	33.16	1163.91	Observador	520.00	33.16	1163.91
6	F	19	Defender			1359.18	34.08	502.00	520.00	520.00	33.16	33.16	1163.91	1163.91	520.00	33.16	1163.91	Observador 1	520	33.16	1163.91	Observador	520.00	33.16	1163.91
6	F	19	Defender			1415.92	34.64	491.00	520.00	520.00	33.16	33.16	1163.91	1163.91	520.00	33.16	1163.91	Observador 1	520	33.16	1163.91	Observador	520.00	33.16	1163.91
7	G	23	Defender	58.68	1.65	1369.66	36.91	528.00	560.00	560.00	38.46	38.46	1612.29	1612.29	560.00	38.46	1612.29	Observador 1	560	38.46	1612.29	Observador	560.00	38.46	1612.29
7	G	23	Defender			1344.94	38.85	556.00	520.00	520.00	33.16	33.16	1392.02	1392.02	520.00	33.16	1392.02	Observador 1	520	33.16	1392.02	Observador	520.00	33.16	1392.02
7	G	23	Defender			1318.87	33.87	541.00	560.00	560.00	38.46	38.46	1612.29	1612.29	560.00	38.46	1612.29	Observador 1	560	38.46	1612.29	Observador	560.00	38.46	1612.29
7	G	23	Defender			1348.70	35.98	550.00	560.00	560.00	38.46	38.46	1612.29	1612.29	560.00	38.46	1612.29	Observador 1	560	38.46	1612.29	Observador	560.00	38.46	1612.29
7	G	23	Defender			1186.09	33.82	517.00	560.00	560.00	38.46	38.46	1612.29	1612.29	560.00	38.46	1612.29	Observador 1	560	38.46	1612.29	Observador	560.00	38.46	1612.29
7	G	23	Defender			1324.55	33.04	542.00	520.00	520.00	33.16	33.16	1392.02	1392.02	520.00	33.16	1392.02	Observador 1	520	33.16	1392.02	Observador	520.00	33.16	1392.02
8	H	27	Blocker	69.06	1.75	1967.67	37.02	552.00	561.25	557.08	38.63	38.06	1790.16	1764.28	559.17	38.35	1777.22	Observador 1	561.25	38.63	1790.16	Observador	559.17	38.35	1777.22
8	H	27	Blocker			1915.07	38.40	559.00	552.92	569.58	37.49	39.78	1738.68	1842.78	561.25	38.64	1790.73	Observador 1	552.92	37.49	1738.68	Observador	561.25	38.64	1790.73
8	H	27	Blocker			2004.21	38.80	554.00	569.58	557.08	39.78	38.06	1842.78	1764.28	563.33	38.92	1803.53	Observador 1	569.58	39.78	1842.78	Observador	563.33	38.92	1803.53
8	H	27	Blocker			1806.50	36.88	545.00	552.92	557.50	37.49	38.11	1738.68	1766.86	555.21	37.80	1752.77	Observador 1	552.92	37.49	1738.68	Observador	555.21	37.80	1752.77
8	H	27	Blocker			1921.79	37.38	549.00	552.92	552.92	37.49	37.49	1738.68	1738.68	552.92	37.49	1738.68	Observador 1	552.92	37.49	1738.68	Observador	552.92	37.49	1738.68
8	H	27	Blocker			1987.03	38.24	542.00	553.33	540.42	37.55	35.81	1741.23	1663.54	546.88	36.68	1702.39	Observador 1	553.33	37.55	1741.23	Observador	546.88	36.68	1702.39
9	I	40	Blocker	67.02	1.82	2095.27	35.25	507.00	512.08	516.25	32.16	32.68	2223.13	2264.24	514.17	32.42	2243.69	Observador 1	512.08	32.16	2223.13	Observador	514.17	32.42	2243.69
9	I	40	Blocker			1902.27	32.37	520.00	520.42	512.08	33.21	32.16	2305.91	2223.13	516.25	32.69	2264.52	Observador 1	520.42	33.21	2305.91	Observador	516.25	32.69	2264.52
9	I	40	Blocker			1934.92	34.53	519.00	512.08	512.08	32.16	32.16	2223.13	2223.13	512.08	32.16	2223.13	Observador 1	512.08	32.16	2223.13	Observador	512.08	32.16	2223.13
9	I	40	Blocker			1942.23	34.27	497.00	495.42	507.92	30.10	31.63	2064.20	2182.58	501.67	30.87	2123.39	Observador 1	495.42	30.1	2064.2	Observador	501.67	30.87	2123.39
9	I	40	Blocker			1817.18	31.91	499.00	491.25	499.58	29.59	30.61	2025.83	2103.12	495.42	30.10	2064.48	Observador 1	491.25	29.59	2025.83	Observador	495.42	30.10	2064.48
9	I	40	Blocker			1913.20	35.98	510.00	524.58	491.25	33.74	29.59	2348.14	2025.83	507.92	31.67	2186.99	Observador 1	524.58	33.74	2348.14	Observador	507.92	31.67	2186.99
10	J	20	Defender	65.84	1.7	1789.44	41.17	548.00	544.58	557.08	36.37	38.06	1874.64	1965.74	550.83	37.22	1920.19	Observador 1	544.58	36.37	1874.64	Observador	550.83	37.22	1920.19
10	J	20	Defender			1732.94	38.43	565.00	565.42	544.58	39.20	36.37	2028.28	1874.64	555.00	37.79	1951.46	Observador 1	565.42	39.2	2028.28	Observador	555.00	37.79	1951.46
10	J	20	Defender			1687.78	39.16	559.00	548.75	552.92	36.93	37.49	1904.65	1935.01	550.84	37.21	1919.83	Observador 1	548.75	36.93	1904.65	Observador	550.84	37.21	1919.83
10	J	20	Defender			1796.25	40.33	554.00	548.75	561.25	36.93	38.63	1904.65	1996.83	555.00	37.78	1950.74	Observador 1	548.75	36.93	1904.65	Observador	555.00	37.78	1950.74
10	J	20	Defender			1558.35	35.68	553.00	548.75	569.58	36.93	39.78	1904.65	2060.11	559.17	38.36	1982.38	Observador 1	548.75	36.93	1904.65	Observador	559.17	38.36	1982.38
10	J	20	Defender			1671.82	38.94	567.00	570.00	569.58	39.84	39.78	2063.31	2060.11	569.79	39.81	2061.71	Observador 1	570	39.84	2063.31	Observador	569.79	39.81	2061.71
11	K	22	Defender	69.77	1.77	1806.18	32.42	525.00	532.08	544.58	34.72	36.37	1631.42	1705.67	538.33	35.55	1668.55	Observador 1	532.08	34.72	1631.42	Observador	538.33	35.55	1668.55
11	K	22	Defender			1904.86	35.85	517.00	515.83	527.92	32.63	34.18	1538.55	1607.22	521.88	33.41	1572.89	Observador 1	515.83	32.63	1538.55	Observador	521.88	33.41	1572.89
11	K	22	Defender			1818.73	34.08	517.00	527.92	528.33	34.18	34.23	1607.22	1609.63	528.13	34.21	1608.43	Observador 1	527.92	34.18	1607.22	Observador	528.13	34.21	1608.43
11	K	22	Defender			1946.95	36.39	528.00	540.42	536.25	35.81	35.26	1680.65	1655.90	538.34	35.54	1668.28	Observador 1	540.42	35.81	1680.65	Observador	538.34	35.54	1668.28
11	K	22	Defender			2011.36	36.88	535.00	552.92	544.58	37.49	36.37	1756.55	1705.67	548.75	36.93	1731.11	Observador 1	552.92	37.49	1756.55	Observador	548.75	36.93	1731.11
11	K	22	Defender			1857.37	37.82	564.00	561.25	523.75	38.63	33.64	1808.57	1583.29	542.50	36.14	1695.93	Observador 1	561.25	38.63	1808.57	Observador	542.50	36.14	1695.93
																		Observador 2	480	28.25	1443.61	Plataforma	462	26.31	1244.52
																		Observador 2	480	28.25	1443.61	Plataforma	473	26.4	1214.55
																		Observador 2	440	23.74	1228.9	Plataforma	467	27.43	1248.67
																		Observador 2	440	23.74	1228.9	Plataforma	466	25.12	1169.15
																		Observador 2	440	23.74	1228.9	Plataforma	465	26.17	1157.85
																		Observador 2	440	23.74	1228.9	Plataforma	455	25.85	1186.93
																		Observador 2	560	38.46	2257.03	Plataforma	516	35.47	1765.41
																		Observador 2	520	33.16	1920.85	Plataforma	535	35.63	1944.6
																		Observador 2	560	38.46	2257.03	Plataforma	518	35.66	1788.84
																		Observador 2	520	33.16	1920.85	Plataforma	536	37.96	1822.83
																		Observador 2	560	38.46	2257.03	Plataforma	528	36.2	1686.9
																		Observador 2	520	33.16	1920.85	Plataforma	542	37.1	1792.49
																		Observador 2	480	28.25	1130.52	Plataforma	461	27.36	1403.91
																		Observador 2	480	28.25	1130.52	Plataforma	481	28.24	1516.61
																		Observador 2	480	28.25	1130.52	Plataforma	481	26.31	1387.28
																		Observador 2	480	28.25	1130.52	Plataforma	467	29.11	1520.69
																		Observador 2	480	28.25	1130.52	Plataforma	452	26.06	1485.18
																		Observador 2	480	28.25	1130.52	Plataforma	454	27.39	1416.86
																		Observador 2	515.42	32.58	1595.56	Plataforma	509	34.14	2105.52
																		Observador 2	511.25	32.05	1572.36	Plataforma	515	31.91	2128.45
																		Observador 2	519.58	33.1	1619.01	Plataforma	516	35.39	2081.97
																		Observador 2	528.33	34.23	1669.1	Plataforma	514	33.53	2012.68
																		Observador 2	515.42	32.58	1595.56	Plataforma	529	33.53	2067.31
																		Observador 2	507.08	31.53	1549.4	Plataforma	512	30.34	2111.21
																		Observador 2	548.75	36.93	2138.12	Plataforma	528	36.2	1896.52
																		Observador 2	536.67	35.32	2040.03	Plataforma	540	38.21	1997.64
																		Observador 2	548.75	36.93	2138.12	Plataforma	541	37.29	1938.06
																		Observador 2	536.25	35.26	2036.71	Plataforma	540	35.77	1953.11
																		Observador 2	557.08	38.06	2207.8	Plataforma	559	36.77	1888.91
																		Observador 2	540.42	35.81	2070.11	Plataforma	550	40.85	2080.96
																		Observador 2	560	38.46	1324.72	Plataforma	510	34.48	1342.36
																		Observador 2	520	33.16	1163.91	Plataforma	501	32.91	1334.92
																		Observador 2	520	33.16	1163.91	Plataforma	500	34.14	1319.2
																		Observador 2	520	33.16	1163.91	Plataforma	509	33.74	1368.88
																		Observador 2	520	33.16	1163.91	Plataforma	502	34.08	1359.18
																		Observador 2	520	33.16	1163.91	Plataforma	491	34.64	1415.92
																		Observador 2	560	38.46	1612.29	Plataforma	528	36.91	1369.66
																		Observador 2	520	33.16	1392.02	Plataforma	556	38.85	1344.94
																		Observador 2	560	38.46	1612.29	Plataforma	541	33.87	1318.87
																		Observador 2	560	38.46	1612.29	Plataforma	550	35.98	1348.7
																		Observador 2	560	38.46	1612.29	Plataforma	517	33.82	1186.09
																		Observador 2	520	33.16	1392.02	Plataforma	542	33.04	1324.55
																		Observador 2	557.08	38.06	1764.28	Plataforma	552	37.02	1967.67
																		Observador 2	569.58	39.78	1842.78	Plataforma	559	38.4	1915.07
																		Observador 2	557.08	38.06	1764.28	Plataforma	554	38.8	2004.21
																		Observador 2	557.5	38.11	1766.86	Plataforma	545	36.88	1806.5
																		Observador 2	552.92	37.49	1738.68	Plataforma	549	37.38	1921.79
																		Observador 2	540.42	35.81	1663.54	Plataforma	542	38.24	1987.03
																		Observador 2	516.25	32.68	2264.24	Plataforma	507	35.25	2095.27
																		Observador 2	512.08	32.16	2223.13	Plataforma	520	32.37	1902.27
																		Observador 2	512.08	32.16	2223.13	Plataforma	519	34.53	1934.92
																		Observador 2	507.92	31.63	2182.58	Plataforma	497	34.27	1942.23
																		Observador 2	499.58	30.61	2103.12	Plataforma	499	31.91	1817.17
																		Observador 2	491.25	29.59	2025.83	Plataforma	510	35.98	1913.2
																		Observador 2	557.08	38.06	1965.74	Plataforma	548	41.17	1789.44
																		Observador 2	544.58	36.37	1874.64	Plataforma	565	38.43	1732.94
																		Observador 2	552.92	37.49	1935.01	Plataforma	559	39.16	1687.78
																		Observador 2	561.25	38.63	1996.83	Plataforma	554	40.33	1796.25
																		Observador 2	569.58	39.78	2060.11	Plataforma	553	35.68	1558.35
																		Observador 2	569.58	39.78	2060.11	Plataforma	567	38.94	1671.82
																		Observador 2	544.58	36.37	1705.67	Plataforma	525	32.42	1806.18
																		Observador 2	527.92	34.18	1607.22	Plataforma	517	35.85	1904.86
																		Observador 2	528.33	34.23	1609.63	Plataforma	517	34.08	1818.73
																		Observador 2	536.25	35.26	1655.9	Plataforma	528	36.39	1946.95
																		Observador 2	544.58	36.37	1705.67	Plataforma	535	36.88	2011.36
																		Observador 2	523.75	33.64	1583.29	Plataforma	564	37.82	1857.37
